# Supplementary material
Source: PubMed Central journal article supplement (PMC7549840)
Supplement: NIHMS1616969-supplement-7.pdf [file NIHMS1616969-supplement-7.pdf]

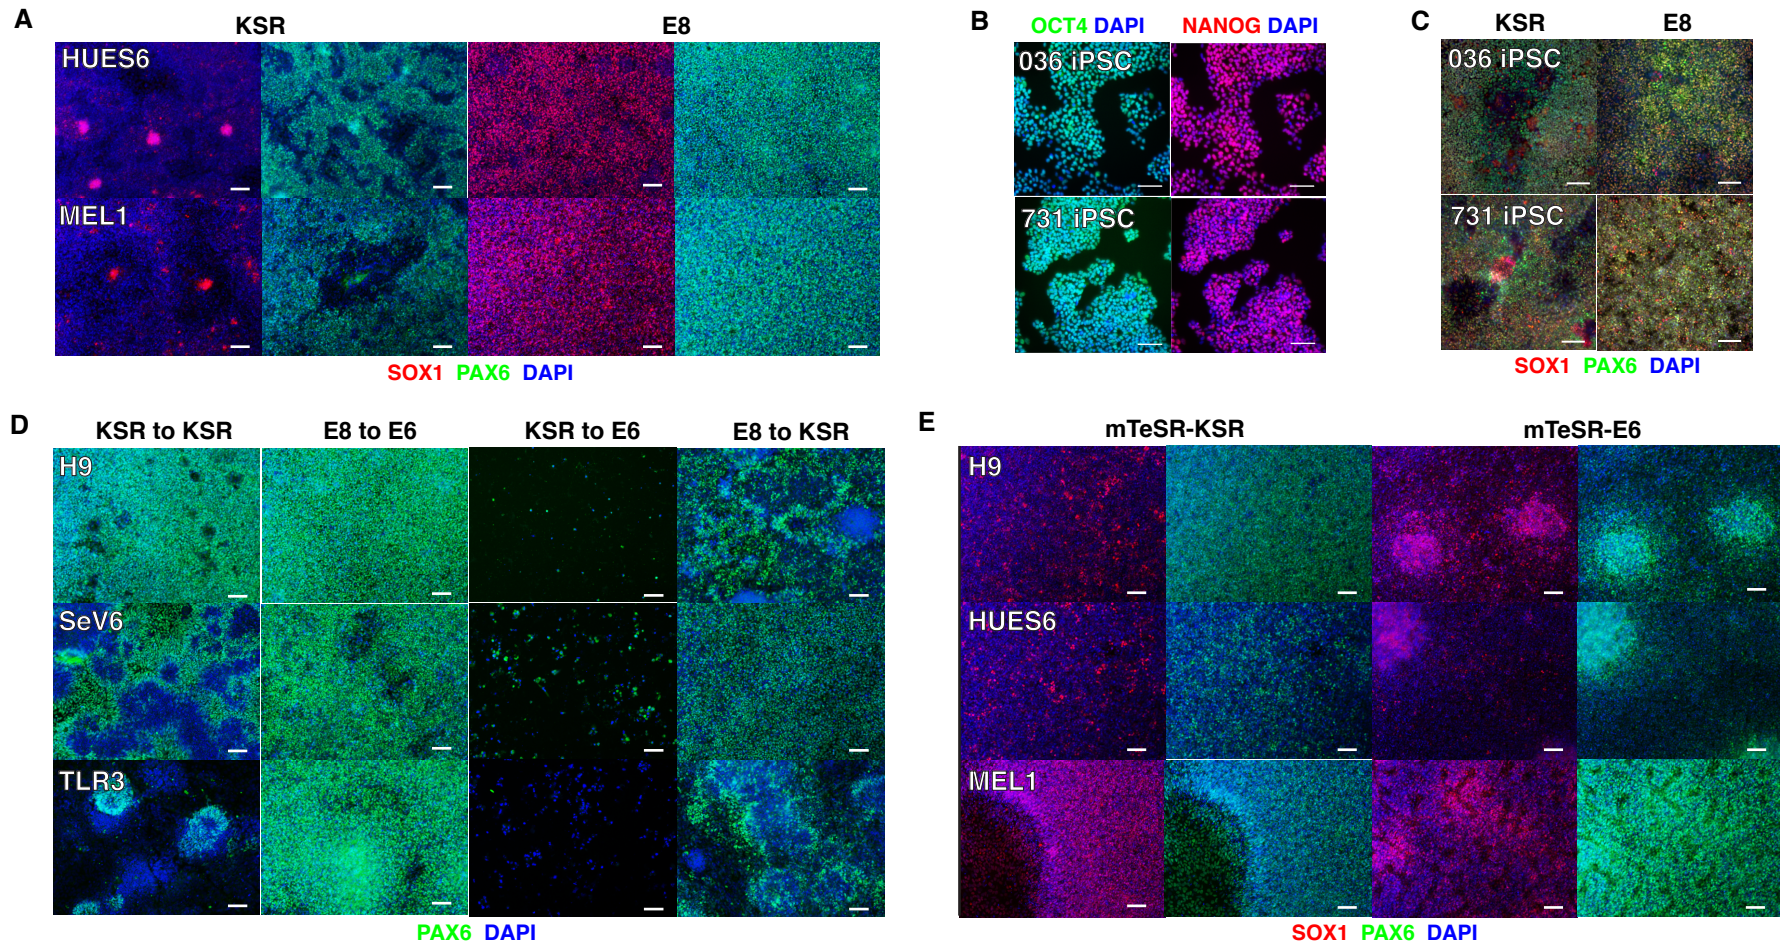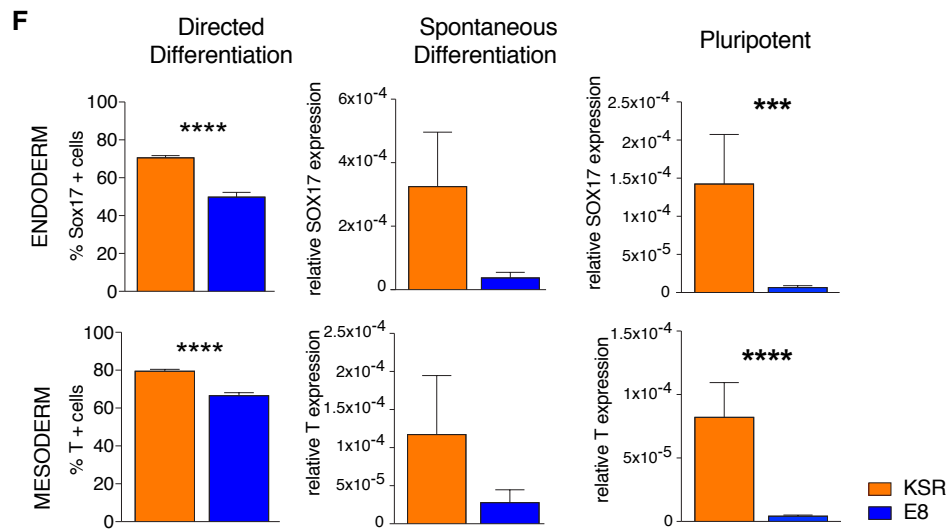

## Figure S1, Related to Figure 1

### Germlayer differentiation propensity of hPSC in KSR, E8 and mTeSR medium. Validation of newly derived hiPSC.

**A.** Immunofluorescence of neuroectodermal (NE) precursor markers SOX1 and PAX6 at day 10 of neural induction in HUES6 and MEL1 hESC in KSR or E8. **B.** Immunofluorescence of OCT4 and NANOG pluripotency markers in newly reprogrammed iPSC lines 706 and 731. **C.** Immunofluorescence of neuroectodermal (NE) precursor markers SOX1 (red) and PAX6 (green) at day 10 of neural induction in 706 and 731 hiPSC lines in KSR or E8. **D.** Immunofluorescence of PAX6 neuroectodermal marker in 3 independent hPSC lines (H9, SeV, TLR3) grown KSR and differentiated in E6 medium or grown in E8 and differentiated in KSR medium at day 10 of neural induction. **E.** Immunofluorescence of SOX1 and PAX6 at day 10 of neural induction in H9, HUES6, MEL1 hESC grown in mTeSR and differentiated in either KSR or E6-based medium. **F.** Percentage of cells positive for endoderm (ENDO) marker SOX17 and mesoderm (MESO) marker T at day 10 of directed differentiation towards ENDO (top) or MESO (bottom), respectively of KSR versus E8 hESC (left).  $n \geq 7$  wells per each line (H9, HUES6, MEL1) were quantified. Relative expression of SOX17 and T in day 7 embryoid bodies (EB) generated from KSR or E8 hPSC (middle)  $n=3$  replicates per each hESC line (H9, HUES6, MEL1). Relative expression of SOX17 and T in undifferentiated cells (right).  $n=3$  replicates per each hESC line (H9, HUES6, MEL1). Mean values and SEM of three independent hESC lines H9, Hues6, MEL1 are shown. **A.-E.** Scale bars 100  $\mu\text{m}$ , p-values (two tailed t-test): \* < 0.05, \*\* < 0.01, \*\*\* < 0.001, \*\*\*\* < 0.0001



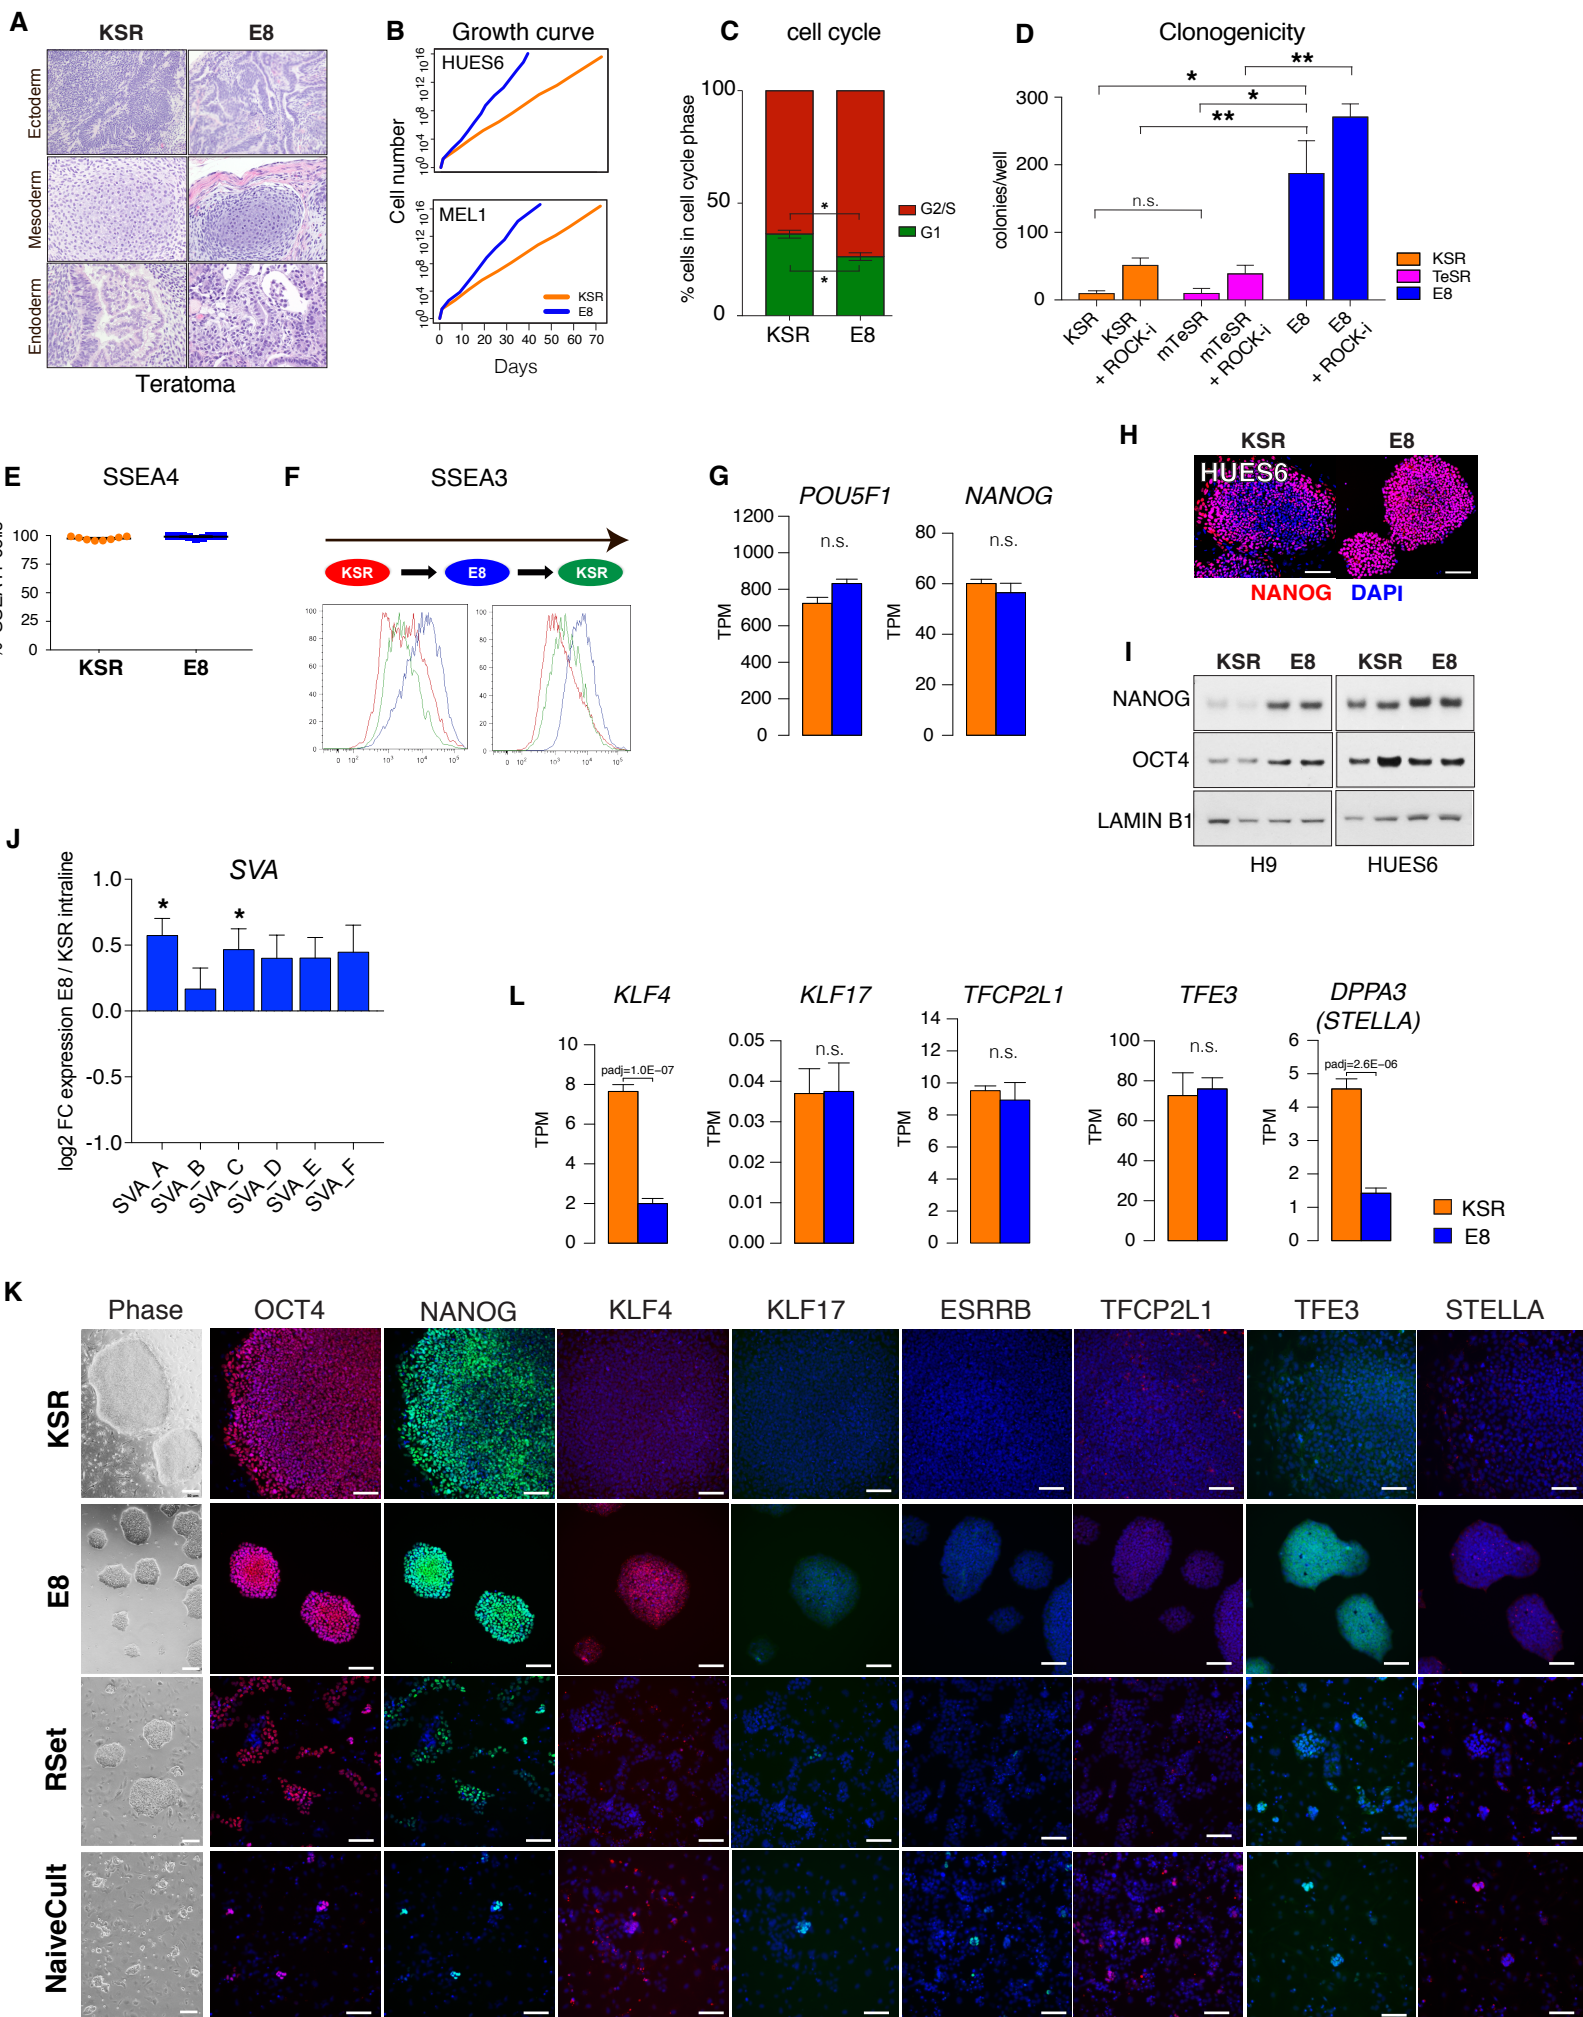

## Figure S2, Related to Figure 2

### General and naïve-associated pluripotency features in KSR and E8 hPSC.

**A.** Representative images of teratoma assay from KSR or E8 hESC (HUES6). **B.** Growth curve of hESC (HUES6, MEL1) grown in KSR or E8. **C.** Flow cytometry analysis of cell cycle distribution of KSR or E8 hPSC. n=9 **D.** Quantification of colony formation after single cell passaging of KSR, mTeSR or E8 hPSC without or with Rock-inhibitor drug (+ROCK-i). Mean values and SEM of 3 technical replicates per hESC line H9, HUES6, MEL1 are shown. KSR and E8 values are same as shown in Figure 2D. **E.** Flow cytometry quantification of SSEA4 positive cells in KSR and E8 hPSC. Single dots represent technical replicates from H9, HUES6, MEL1 hESC. **F.** Flow cytometry histogram of SSEA3 intensity in hESC grown in KSR (red), adapted to E8 (blue) and re-adapted to KSR (green). **G.** Expression level (RNA-seq) of OCT4 (POU5F1), NANOG; **H.** Immunofluorescence staining of NANOG in KSR or E8 hPSC (HUES6) **I.** Western blot of NANOG, OCT4 and loading control LAMIN B1 in KSR and E8 hPSC (H9, HUES6) **J.** Log2 fold change expression E8/KSR within each cell line of SVA transposable elements. P-value was calculated on triplicate values from all 3 cell lines (H9, HUES6, MEL1) in E8 vs. KSR. **K.** Immunofluorescence of core pluripotency and naïve markers in KSR, E8, RSet and NaiveCult H9 hESC. Scale bar bright field images 50  $\mu$ m. Scale bars fluorescence images 100  $\mu$ m L. Expression level (RNA-seq) of KLF4, KLF17, TFCEP2L1, TFE3, DPPA3 (STELLA) (padj determined by DESeq2). p-values (two tailed t-test): \* < 0.05, \*\* < 0.01, \*\*\* < 0.001, \*\*\*\* < 0.0001. tailed t-test): \* < 0.05, \*\* < 0.01, \*\*\* < 0.001, \*\*\*\* < 0.0001



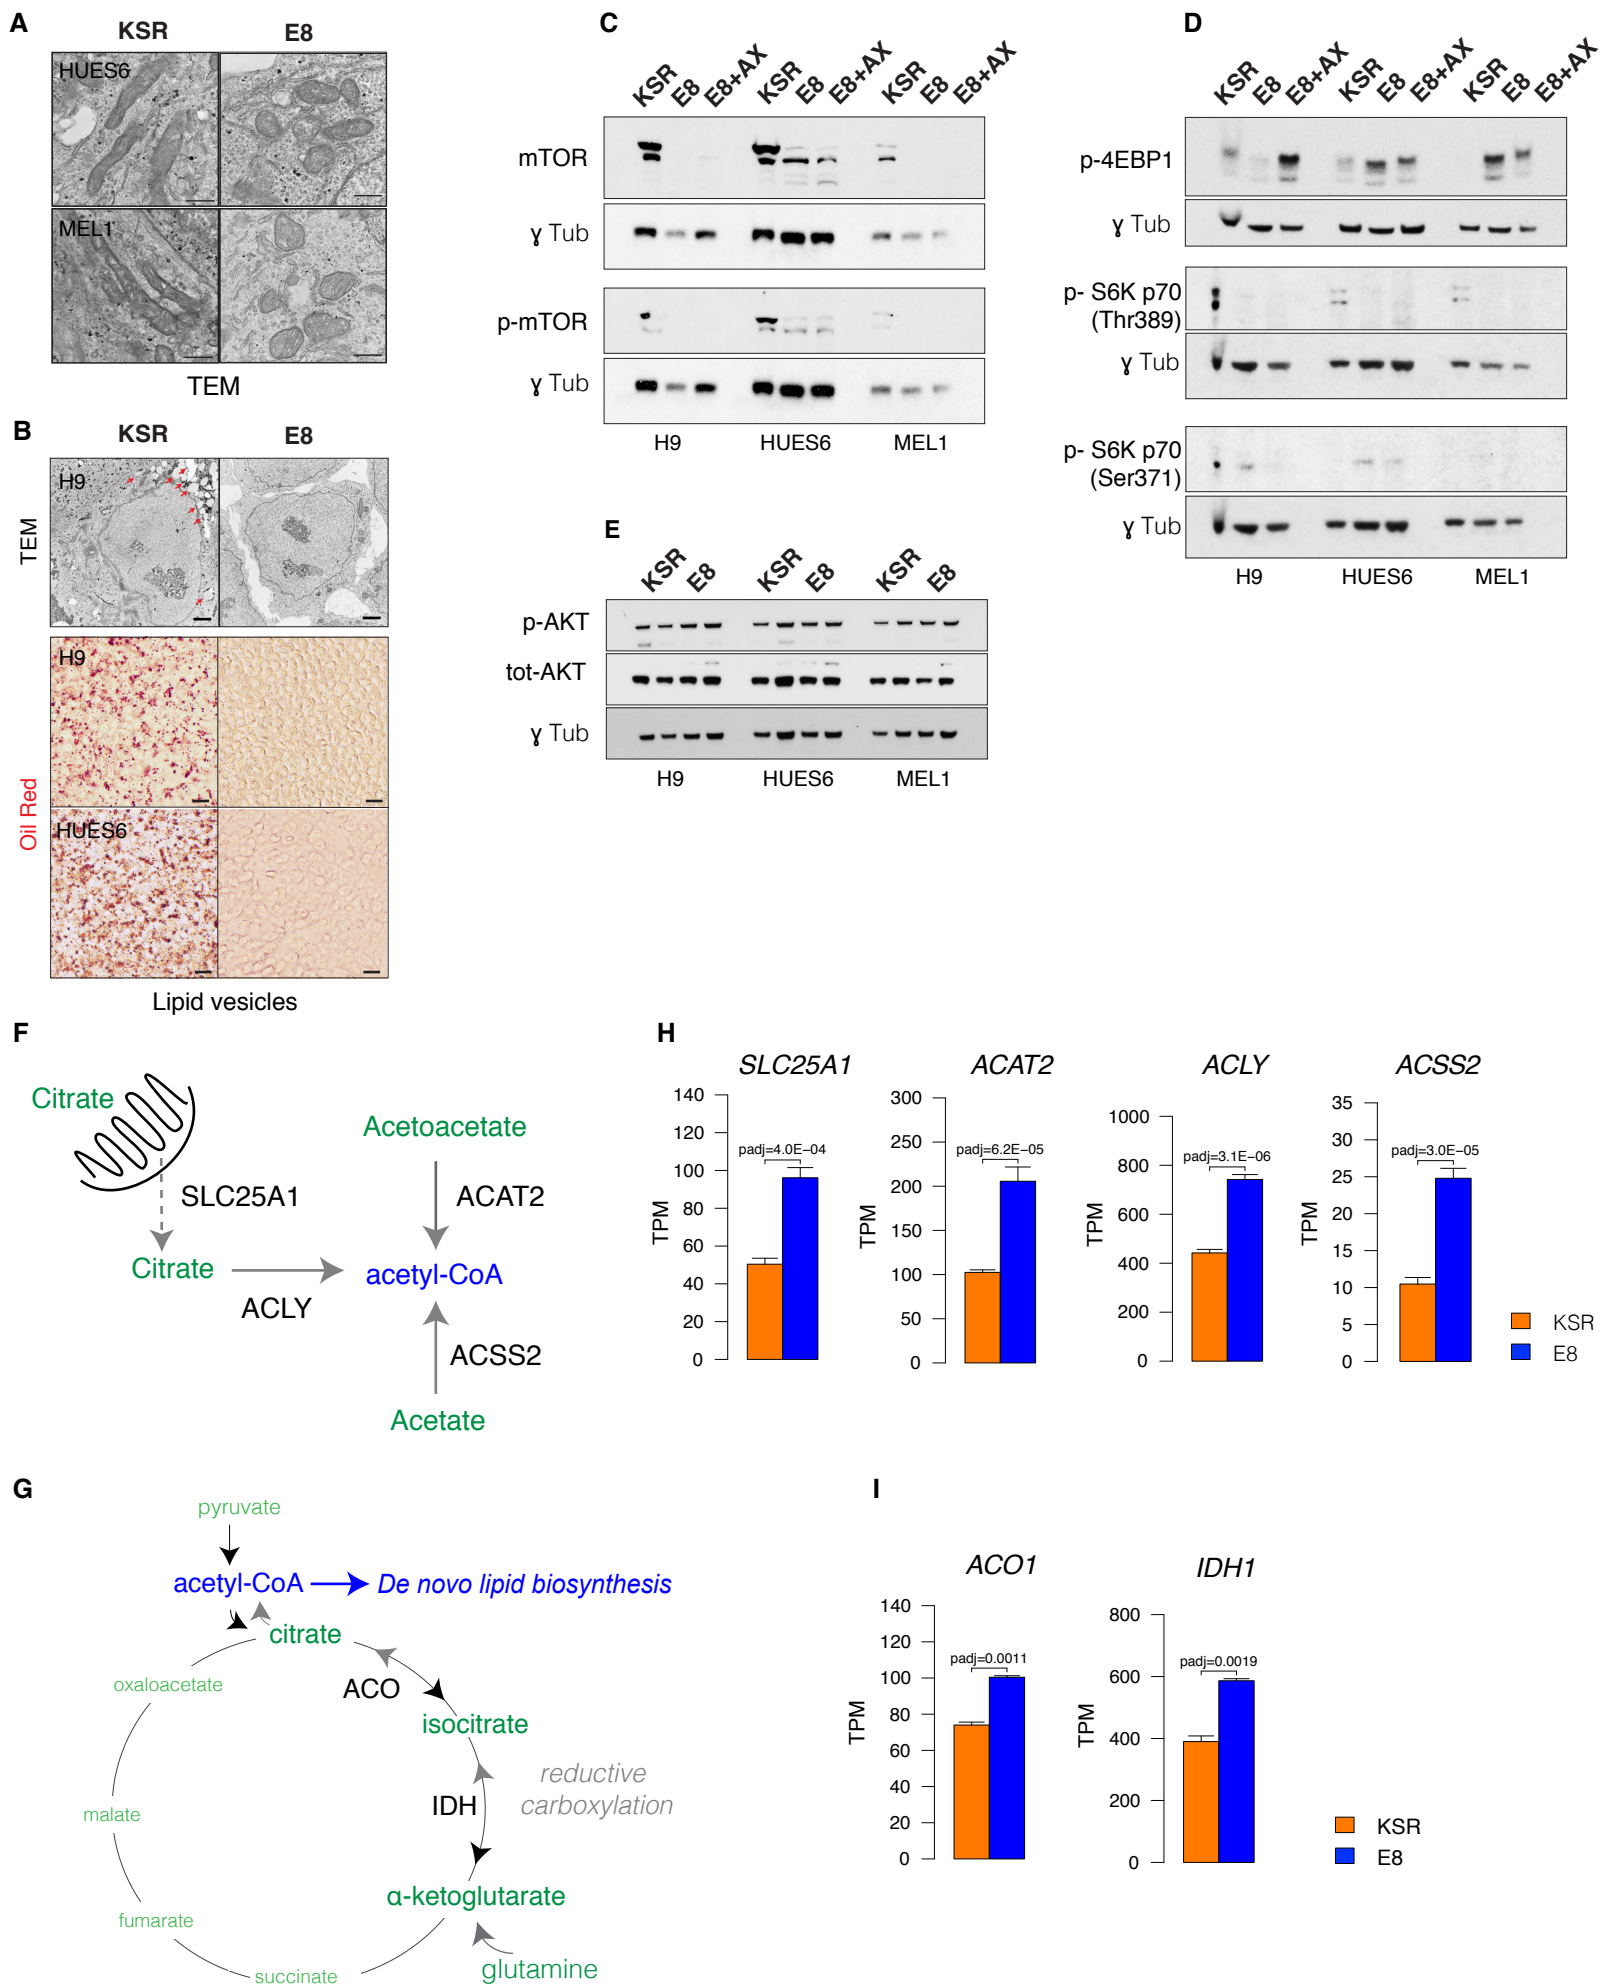

### Figure S3, Related to Figure 4

#### **E8 vs. KSR hPSC comparison of mitochondrial morphology, intracellular lipid storage, mTOR activation state and expression levels of genes involved in the generation of lipogenic precursor acetyl-coA.**

**A.** Transmission electron microscopy (TEM) images of mitochondrial morphology in KSR and E8 hESC (HUES6, MEL1). Scale bar 0.5  $\mu\text{m}$ . **B.** TEM images of KSR and E8 hESC (H9). Red arrows indicate fat droplets (top). Scale bar 2  $\mu\text{m}$ . Oil Red staining of intracellular lipids (bottom) in KSR and E8 hESC (H9, HUES6). Scale bar 20  $\mu\text{m}$  **C, D.** Western blot of mTOR signaling (total mTOR, activated p(phosphor)-mTOR) and downstream effectors p(hospho)-4EBP1 and p(hospho)-S6K p70 (Thr389/Ser371) in KSR, E8 and E8 + Albumax hESC. **E.** Western blot of AKT signaling (total AKT, activated p(hospho)-AKT in E8 and KSR hESC. **F.** Scheme of enzymatic pathways of acetyl-coA generation. **G.** Scheme of acetyl-coA generation through canonical pathways (pyruvate) or via reductive carboxylation (glutamine) **H, I.** Expression level (RNA-seq) of enzymes involved in canonical (H) or reductive carboxylation-mediated (I) acetyl-CoA production SLC25A1, ACLY, ACAT2, ACSS2 (H) and ACO1, IDH1 (I) (p<sub>adj</sub> determined by DESeq2).

**A**

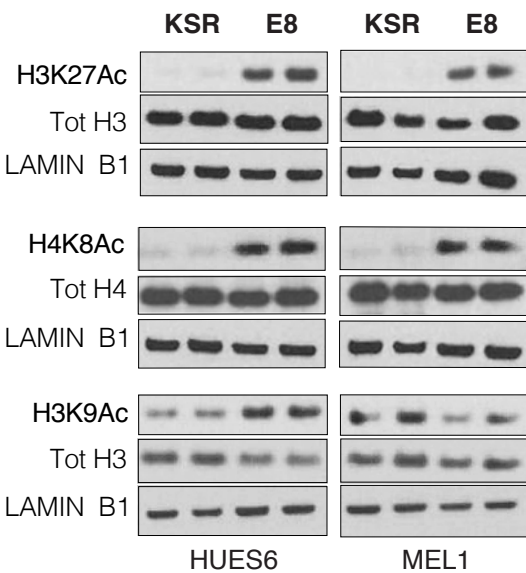

**B**

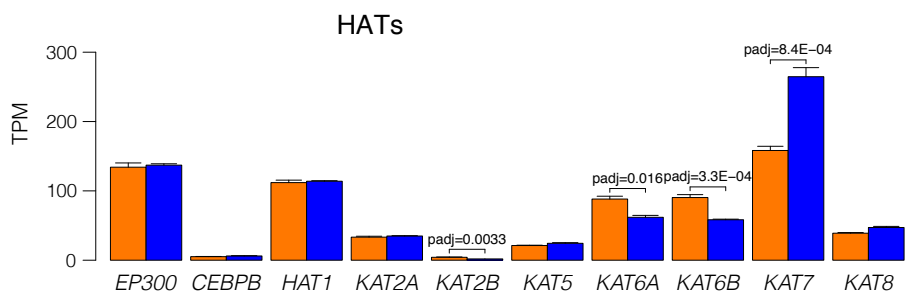

**C**

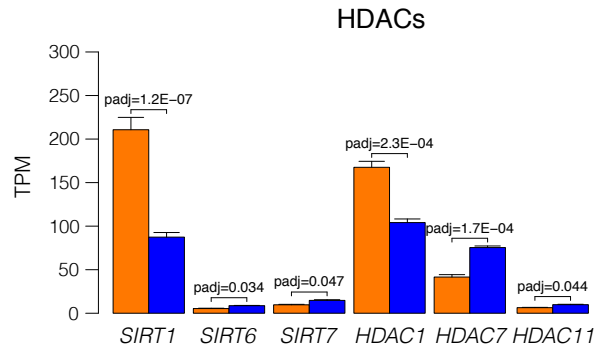

**D**

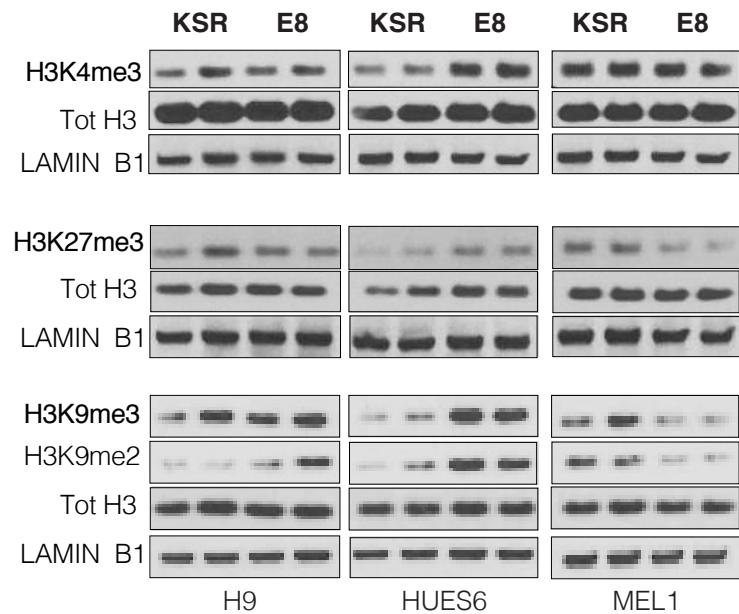

**E**

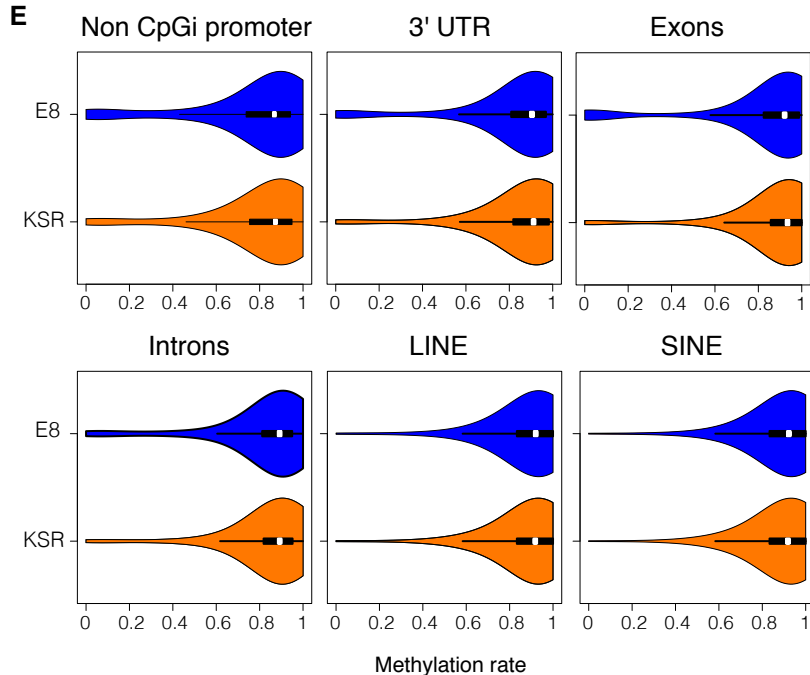

**F**

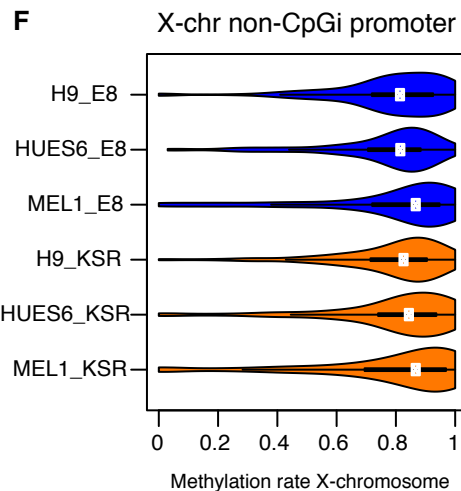

**G**

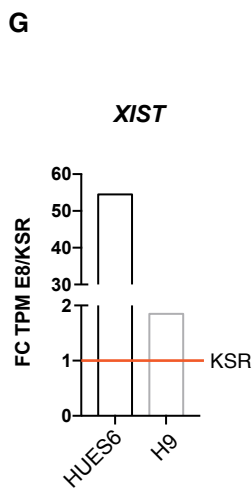

**H**

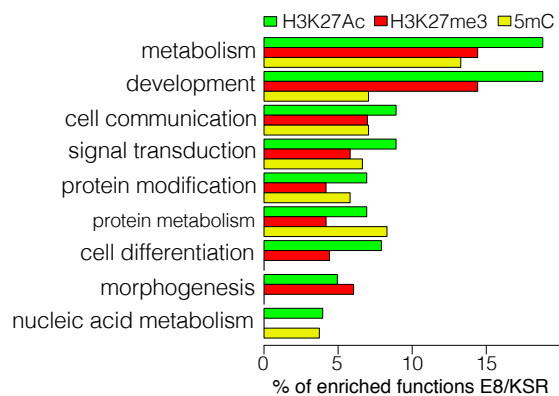



## Figure S4, Related to Figure 5

### Epigenomic characterization of E8 vs. KSR hPSC.

**A.** Western blot of H3K27Ac, H4K8Ac, H3K9Ac levels in KSR and E8 hESC (HUES6, MEL1). **B., C.** Expression level (RNA-seq) of histone acetyl transferase (HAT, (B)) and histone deacetylase (HDAC; (C)) genes in KSR and E8 hESC. Mean values and SEM of hESC H9, HUES6, MEL1 are shown. **D.** Western blot of H3K4me3, H3K27me3, H3K9me3 levels in KSR and E8 hESC. **E.** Violin plots of 5mC rate distribution at different genomic compartments in KSR and E8 hESC. (padj determined by DESeq2). **F.** Methylation rate distribution at non-CpGi promoters on X-chromosome in each analyzed cell line, E8 and KSR (XX indicates female and XY indicates male line). **G.** Fold change expression of XIST in E8 vs. KSR in two female lines H9 and HUES6. **H.** Top enriched functional groups (GO) of H3K27Ac, H3K27me3 and 5mC differentially enriched gene promoters between KSR and E8.

**A**

|                         | KSR medium                                                                                                                                                             | E8 medium                                                                                           |
|-------------------------|------------------------------------------------------------------------------------------------------------------------------------------------------------------------|-----------------------------------------------------------------------------------------------------|
| Base medium             | DMEM-F12                                                                                                                                                               | DMEM-F12                                                                                            |
| Core Supplement         | KSR supplement:<br>- ALBUMAX<br>- aa*<br>- trace elements<br>- Vitamins:<br>Thiamine*<br>reduced glutathione<br>ascorbic acid<br>- Proteins:<br>transferrin<br>insulin | E8 supplement:<br>Selenium<br>- Vitamins:<br>ascorbic acid<br>- Proteins:<br>transferrin<br>insulin |
| additional supplements  | FGF2 (10 ng/ml)<br>β-ME<br>L-Glutamine*<br>NE-aa*                                                                                                                      | FGF2 (100 ng/ml)<br>TGFβ                                                                            |
| substrate               | iMEF                                                                                                                                                                   | Vitronectin                                                                                         |
| * contained in DMEM F12 |                                                                                                                                                                        |                                                                                                     |

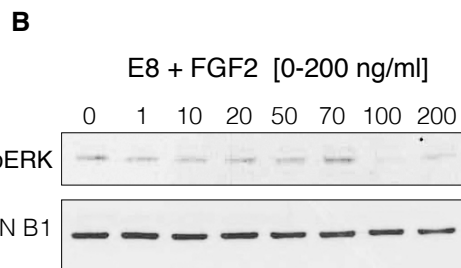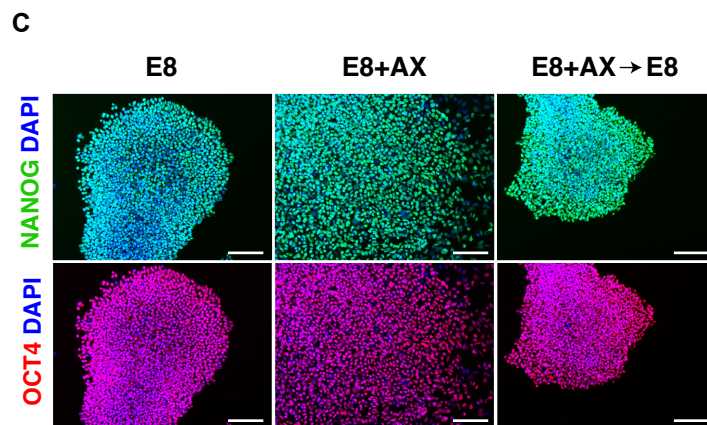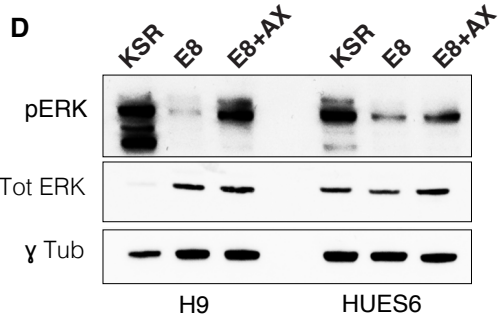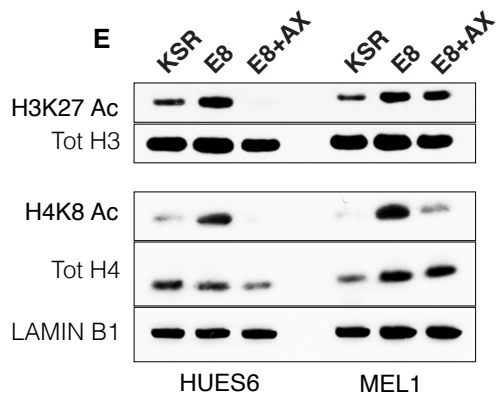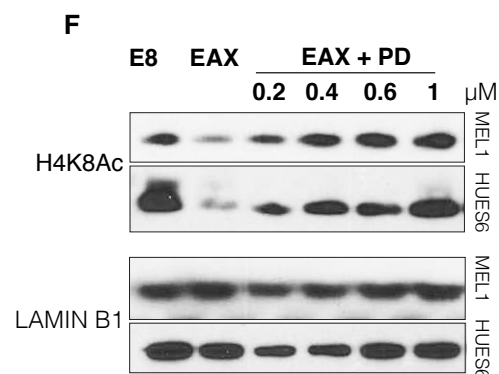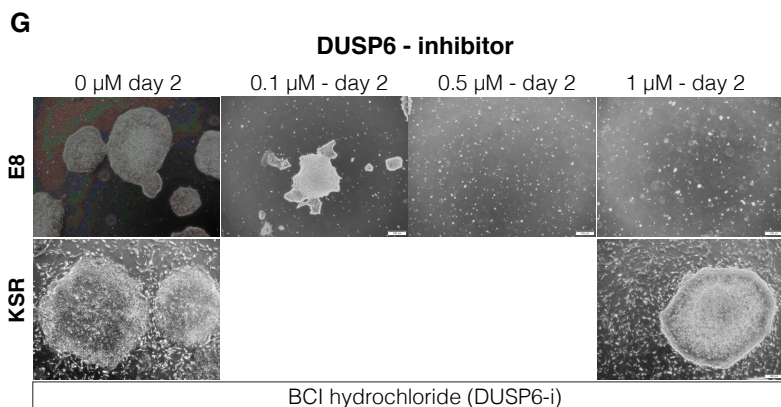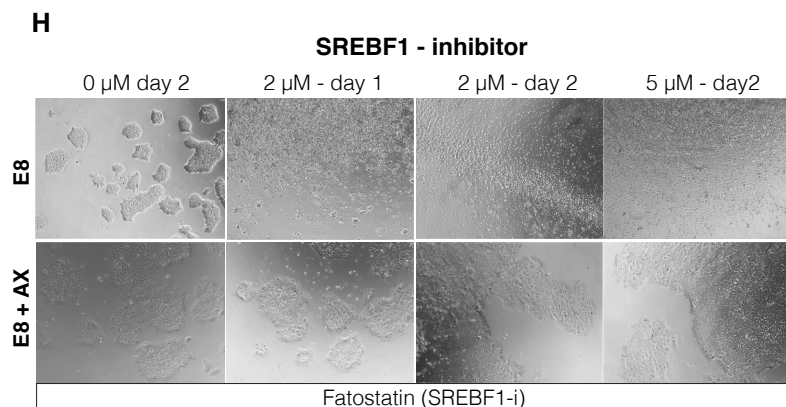

**Figure S5, Related to Figure 6**

**KSR vs. E8 medium composition, FGF2 concentration response and effect of Albumax treatment on ERK signaling and epigenetic marks; tolerance to DUSP6 and SREBF1 inhibition.**

**A.** KSR and E8 medium composition **B.** Western blot of phospho-ERK levels in E8 containing different concentrations of FGF2 (0, 1, 10, 20, 50, 100, 200 ng/ml). **C.** Immunofluorescence staining of NANOG and OCT4 in E8, E8+Albumax (E8+AX) and after Albumax withdrawal (E8+AX -> E8). Scale bar 200  $\mu$ m. **D.** Western blot of phospho-ERK levels in KSR, E8 and E8 + Albumax (E8 + AX) hESC (H9, HUES6). Loading controls ERK,  $\gamma$  Tubulin. **E.** Western blot of H3K27Ac and H4K8Ac levels in KSR, E8 and E8+AX hESC (H9). Loading controls: Total H3, H4 and LAMIN B1. **F.** Western blot of H4K8Ac levels in E8, E8+Albumax (EAX) and EAX + 0.2, 0.4, 0.6 or 1  $\mu$ M PD0325901. Loading control LAMIN B1. **G.** Bright field images of E8 and KSR hESC (H9) after a 2-day treatment with 0  $\mu$ M, 0.1  $\mu$ M, 0.5  $\mu$ M BCI hydrochloride (DUSP6 inhibitor) **H.** Bright field images of E8 and E8+Albumax (E8+AX) hESC (H9) after a treatment with 0  $\mu$ M, 2  $\mu$ M or 5  $\mu$ M Fatostatin (SREBF1 inhibitor) for 1 or 2 days. **C-F.** Length of treatment/withdrawal from treatment: 3 days.



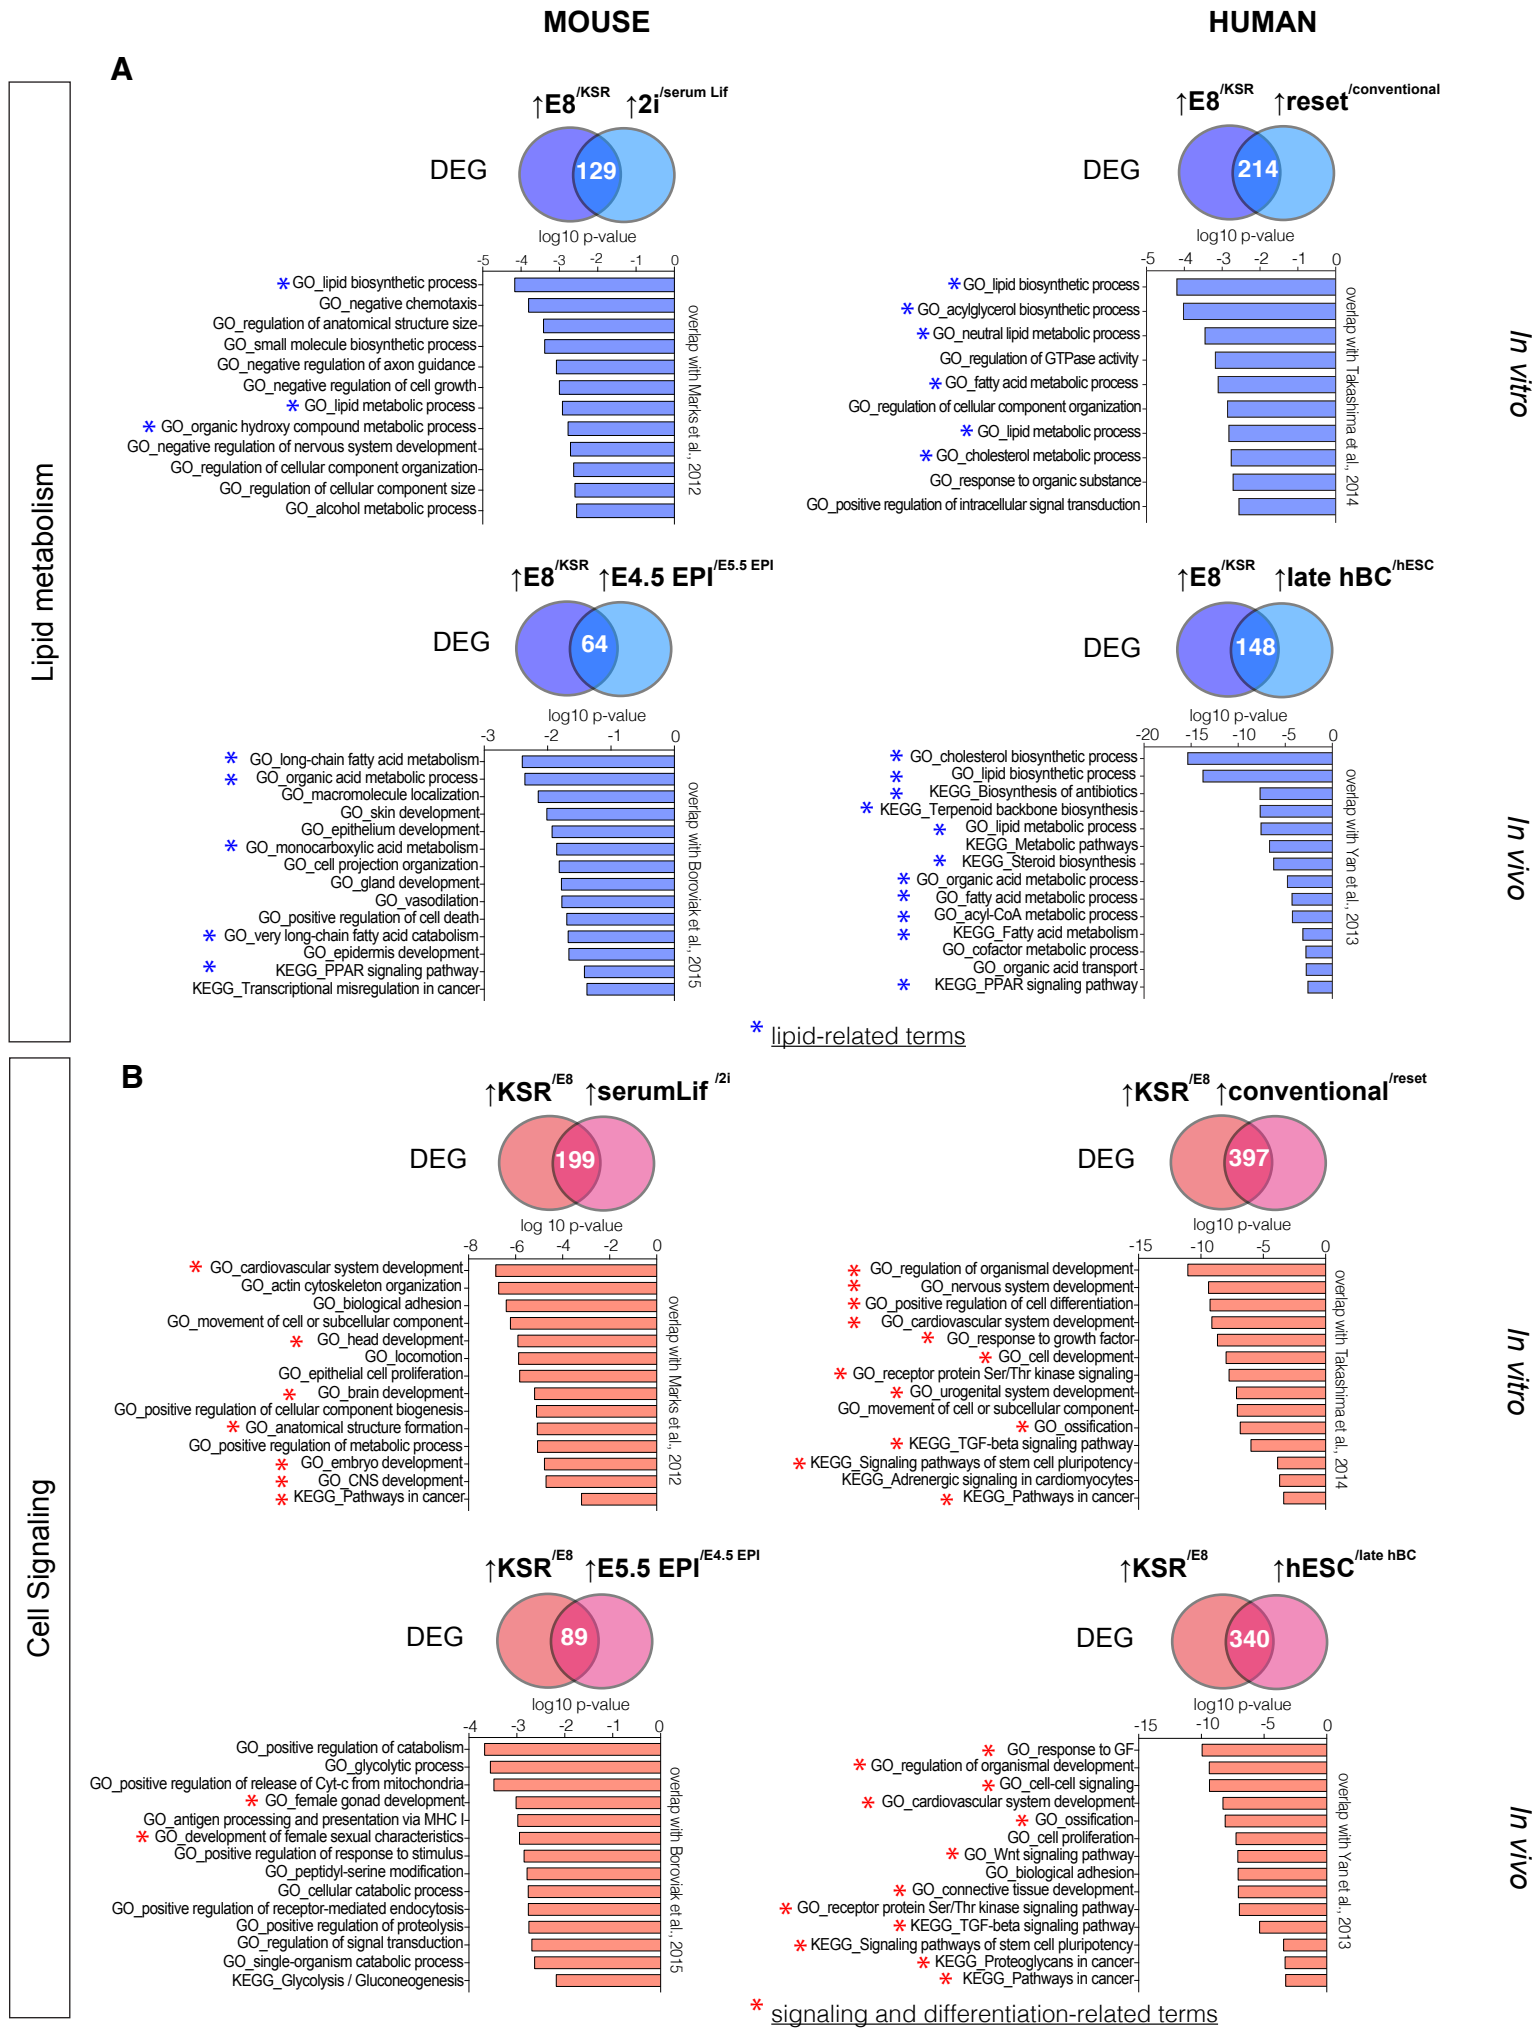

**Figure S6, Related to Figure 7**

**Functional enrichment of shared upregulated genes between E8 vs. naïve and KSR vs. primed datasets.**

**A.** Top enriched functional categories (GO/KEGG) of common upregulated genes in E8/KSR and each naïve/primed datasets (Boroviak et al., 2015; Marks et al., 2012; Takashima et al., 2014; Yan et al., 2013). Blue asterisks indicate lipid-related categories. **B.** Top enriched functional categories (GO/KEGG) of common downregulated genes in E8/KSR and each naïve/primed datasets (Boroviak et al., 2015; Marks et al., 2012; Takashima et al., 2014; Yan et al., 2013). Red asterisks indicate signaling-related categories.

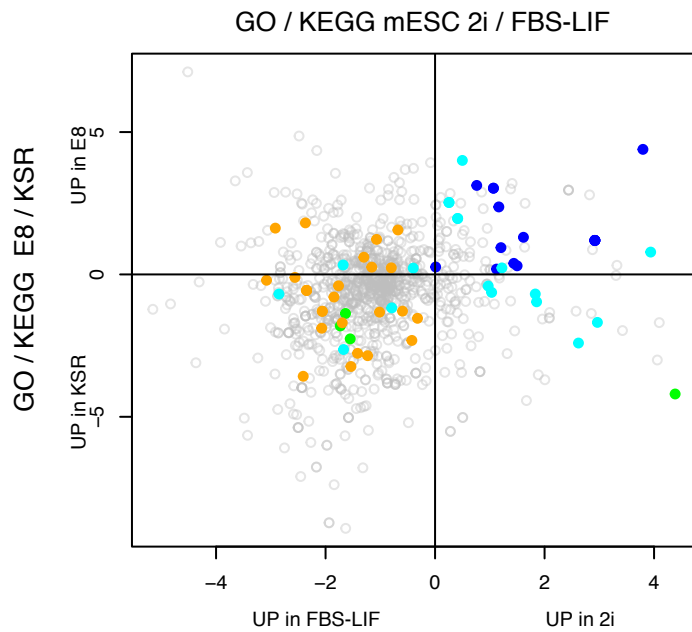

Marks et al., 2012

Lipid biosynthesis  
Lipid metabolism  
Lipid catabolism  
Response to lipid  
MAPK/TGFbeta signaling

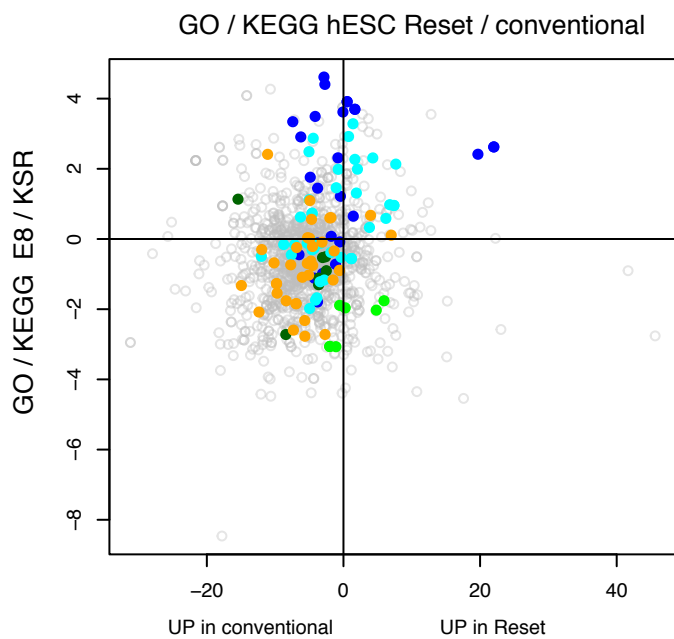

Takashima et al., 2014

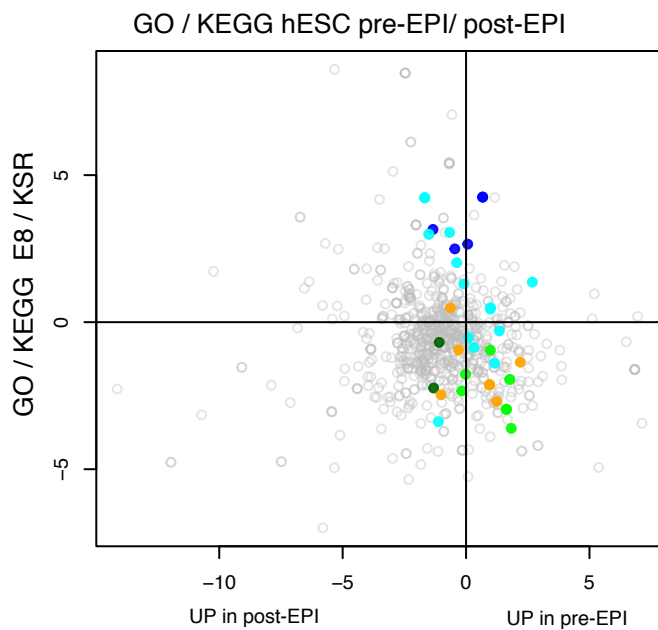

Boroviak et al., 2015



**Figure S7, Related to Figure 7**

**Gene function correlation plot of E8/KSR vs mouse naïve/primed datasets and E8/KSR vs. Reset/conventional hESC.**

2D-plot of lipid and signaling pathway regulation in E8/KSR and different naïve/primed datasets (Boroviak et al., 2015; Marks et al., 2012; Takashima et al., 2014)

## LIPID-RELATED GENE FUNCTIONS IN NAIVE AND PRIMED DATASETS

|                 |                                                  | <b>UP in E8</b>     |               | <b>Tot genes</b>   |  |
|-----------------|--------------------------------------------------|---------------------|---------------|--------------------|--|
| <b>Category</b> | <b>Term</b>                                      | <b>nr. of genes</b> | <b>PValue</b> | <b>in category</b> |  |
| KEGG_PATHWAY    | Steroid biosynthesis                             | 10                  | 1.51E-05      | 20                 |  |
| KEGG_PATHWAY    | Biosynthesis of antibiotics                      | 33                  | 8.54E-04      | 212                |  |
| KEGG_PATHWAY    | Fatty acid metabolism                            | 11                  | 0.006         | 48                 |  |
| KEGG_PATHWAY    | Terpenoid backbone biosynthesis                  | 7                   | 0.008         | 22                 |  |
| KEGG_PATHWAY    | Fatty acid biosynthesis                          | 5                   | 0.020         | 13                 |  |
| KEGG_PATHWAY    | Glycerolipid metabolism                          | 11                  | 0.022         | 58                 |  |
| KEGG_PATHWAY    | PPAR signaling pathway                           | 12                  | 0.024         | 67                 |  |
| KEGG_PATHWAY    | Glycerophospholipid metabolism                   | 15                  | 0.028         | 95                 |  |
| KEGG_PATHWAY    | Biosynthesis of unsaturated fatty acids          | 6                   | 0.040         | 23                 |  |
|                 |                                                  |                     |               |                    |  |
| GOTERM_BP_FAT   | cholesterol biosynthetic process                 | 21                  | 2.04E-10      | 48                 |  |
| GOTERM_BP_FAT   | organic hydroxy compound metabolic process       | 60                  | 7.99E-06      | 410                |  |
| GOTERM_BP_FAT   | steroid metabolic process                        | 44                  | 1.97E-05      | 276                |  |
| GOTERM_BP_FAT   | lipid biosynthetic process                       | 77                  | 1.61E-04      | 624                |  |
| GOTERM_BP_FAT   | long-chain fatty-acyl-CoA biosynthetic process   | 12                  | 3.59E-04      | 42                 |  |
| GOTERM_BP_FAT   | lipid metabolic process                          | 139                 | 8.81E-04      | 1330               |  |
| GOTERM_BP_FAT   | acylglycerol metabolic process                   | 20                  | 0.003         | 118                |  |
| GOTERM_BP_FAT   | neutral lipid metabolic process                  | 20                  | 0.003         | 119                |  |
| GOTERM_BP_FAT   | low-density lipoprotein particle clearance       | 6                   | 0.004         | 14                 |  |
| GOTERM_BP_FAT   | glycerolipid metabolic process                   | 45                  | 0.008         | 379                |  |
| GOTERM_BP_FAT   | long-chain fatty acid metabolic process          | 15                  | 0.012         | 90                 |  |
| GOTERM_BP_FAT   | regulation of plasma lipoprotein particle levels | 11                  | 0.013         | 56                 |  |

|                 |                                                     | <b>UP in 2i</b>     |               | <b>Tot genes</b>   |  |
|-----------------|-----------------------------------------------------|---------------------|---------------|--------------------|--|
| <b>Category</b> | <b>Term</b>                                         | <b>nr. of genes</b> | <b>PValue</b> | <b>in category</b> |  |
| KEGG_PATHWAY    | Glycosphingolipid biosynthesis - globo              | 8                   | 5.87E-05      | 15                 |  |
| KEGG_PATHWAY    | Biosynthesis of antibiotics                         | 33                  | 2.04E-04      | 214                |  |
| KEGG_PATHWAY    | Fatty acid metabolism                               | 11                  | 0.005         | 51                 |  |
| KEGG_PATHWAY    | Glycosphingolipid biosynthesis - lacto and neolacto | 7                   | 0.013         | 26                 |  |
| KEGG_PATHWAY    | Glycosphingolipid biosynthesis - ganglio            | 5                   | 0.024         | 15                 |  |
| KEGG_PATHWAY    | Glycerophospholipid metabolism                      | 14                  | 0.028         | 94                 |  |
| KEGG_PATHWAY    | Fatty acid degradation                              | 9                   | 0.032         | 49                 |  |
|                 |                                                     |                     |               |                    |  |
| GOTERM_BP_FAT   | glycolipid metabolic process                        | 24                  | 7.94E-07      | 95                 |  |
| GOTERM_BP_FAT   | liposaccharide metabolic process                    | 24                  | 9.67E-07      | 96                 |  |
| GOTERM_BP_FAT   | lipid metabolic process                             | 135                 | 2.62E-05      | 1217               |  |
| GOTERM_BP_FAT   | glycerophospholipid metabolic process               | 32                  | 3.84E-05      | 184                |  |
| GOTERM_BP_FAT   | glycerolipid metabolic process                      | 43                  | 6.49E-05      | 288                |  |
| GOTERM_BP_FAT   | membrane lipid metabolic process                    | 30                  | 9.14E-05      | 175                |  |
| GOTERM_BP_FAT   | lipid modification                                  | 32                  | 1.07E-04      | 194                |  |
| GOTERM_BP_FAT   | lipid biosynthetic process                          | 65                  | 6.88E-04      | 545                |  |
| GOTERM_BP_FAT   | phospholipid dephosphorylation                      | 10                  | 9.32E-04      | 34                 |  |
| GOTERM_BP_FAT   | cellular lipid catabolic process                    | 28                  | 0.001         | 183                |  |
| GOTERM_BP_FAT   | plasma lipoprotein particle organization            | 8                   | 0.017         | 35                 |  |
| GOTERM_BP_FAT   | response to low-density lipoprotein particle        | 5                   | 0.025         | 15                 |  |
| GOTERM_BP_FAT   | regulation of plasma lipoprotein particle levels    | 10                  | 0.032         | 57                 |  |
| GOTERM_BP_FAT   | cholesterol efflux                                  | 8                   | 0.048         | 43                 |  |
| GOTERM_BP_FAT   | regulation of phospholipid biosynthetic process     | 4                   | 0.049         | 11                 |  |

|                 |                                  | <b>UP in KSR</b>    |               | <b>Tot genes</b>   |  |
|-----------------|----------------------------------|---------------------|---------------|--------------------|--|
| <b>Category</b> | <b>Term</b>                      | <b>nr. of genes</b> | <b>PValue</b> | <b>in category</b> |  |
| GOTERM_BP_FAT   | lipid metabolic process          | 154                 | 5.64E-06      | 1330               |  |
| GOTERM_BP_FAT   | lipid biosynthetic process       | 78                  | 1.57E-04      | 624                |  |
| GOTERM_BP_FAT   | lipid modification               | 40                  | 1.75E-04      | 262                |  |
| GOTERM_BP_FAT   | cellular response to lipid       | 65                  | 3.25E-04      | 509                |  |
| GOTERM_BP_FAT   | membrane lipid metabolic process | 32                  | 5.43E-04      | 204                |  |
| GOTERM_BP_FAT   | fatty acid oxidation             | 19                  | 5.92E-04      | 95                 |  |

|                 |                                       | <b>UP in serum Lif</b> |               | <b>Tot genes</b>   |  |
|-----------------|---------------------------------------|------------------------|---------------|--------------------|--|
| <b>Category</b> | <b>Term</b>                           | <b>nr. of genes</b>    | <b>PValue</b> | <b>in category</b> |  |
| KEGG_PATHWAY    | Fatty acid biosynthesis               | 5                      | 0.039         | 14                 |  |
| KEGG_PATHWAY    | Regulation of lipolysis in adipocytes | 11                     | 0.043         | 57                 |  |
| KEGG_PATHWAY    | Glycerolipid metabolism               | 11                     | 0.047         | 58                 |  |

## UP in reset

| Category      | Term                                             | nr. of genes | PValue   | Tot genes in category |
|---------------|--------------------------------------------------|--------------|----------|-----------------------|
| KEGG_PATHWAY  | Biosynthesis of antibiotics                      | 36           | 6.98E-03 | 212                   |
| GOTERM_BP_FAT | lipid metabolic process                          | 173          | 7.59E-05 | 1330                  |
| GOTERM_BP_FAT | cellular lipid catabolic process                 | 35           | 1.78E-04 | 182                   |
| GOTERM_BP_FAT | regulation of lipid metabolic process            | 47           | 5.98E-04 | 287                   |
| GOTERM_BP_FAT | regulation of plasma lipoprotein particle levels | 15           | 8.12E-04 | 56                    |
| GOTERM_BP_FAT | acylglycerol metabolic process                   | 24           | 0.001    | 118                   |
| GOTERM_BP_FAT | neutral lipid metabolic process                  | 24           | 0.001    | 119                   |
| GOTERM_BP_FAT | glycerolipid metabolic process                   | 57           | 0.001    | 379                   |
| GOTERM_BP_FAT | lipid catabolic process                          | 46           | 0.002    | 294                   |
| GOTERM_BP_FAT | lipid biosynthetic process                       | 84           | 0.003    | 624                   |
| GOTERM_BP_FAT | positive regulation of lipid metabolic process   | 23           | 0.005    | 126                   |
| GOTERM_BP_FAT | regulation of cholesterol homeostasis            | 6            | 0.006    | 13                    |
| GOTERM_BP_FAT | positive regulation of cholesterol efflux        | 6            | 0.009    | 14                    |
| GOTERM_BP_FAT | lipid homeostasis                                | 22           | 0.009    | 124                   |

## UP in late BC

| Category      | Term                                           | nr. of genes | PValue   | Tot genes in category |
|---------------|------------------------------------------------|--------------|----------|-----------------------|
| KEGG_PATHWAY  | Terpenoid backbone biosynthesis                | 12           | 8.34E-07 | 22                    |
| KEGG_PATHWAY  | Biosynthesis of antibiotics                    | 41           | 4.46E-06 | 212                   |
| KEGG_PATHWAY  | Steroid biosynthesis                           | 8            | 1.29E-03 | 20                    |
| KEGG_PATHWAY  | Fatty acid metabolism                          | 12           | 3.03E-03 | 48                    |
| KEGG_PATHWAY  | PPAR signaling pathway                         | 13           | 1.56E-02 | 67                    |
| KEGG_PATHWAY  | Sphingolipid metabolism                        | 10           | 2.28E-02 | 47                    |
| GOTERM_BP_FAT | lipid biosynthetic process                     | 92           | 8.52E-09 | 624                   |
| GOTERM_BP_FAT | lipid metabolic process                        | 156          | 4.44E-07 | 1330                  |
| GOTERM_BP_FAT | sphingolipid metabolic process                 | 28           | 8.33E-05 | 155                   |
| GOTERM_BP_FAT | phospholipid metabolic process                 | 54           | 9.77E-05 | 393                   |
| GOTERM_BP_FAT | cellular lipid catabolic process               | 31           | 9.88E-05 | 182                   |
| GOTERM_BP_FAT | very-low-density lipoprotein particle assembly | 6            | 1.43E-04 | 8                     |
| GOTERM_BP_FAT | lipid catabolic process                        | 43           | 1.43E-04 | 294                   |
| GOTERM_BP_FAT | membrane lipid metabolic process               | 33           | 1.54E-04 | 204                   |
| GOTERM_BP_FAT | phospholipid biosynthetic process              | 34           | 2.87E-04 | 220                   |
| GOTERM_BP_FAT | fatty acid metabolic process                   | 46           | 0.002    | 366                   |
| GOTERM_BP_FAT | response to lipoprotein particle               | 6            | 0.0111   | 18                    |
| GOTERM_BP_FAT | long-chain fatty acid import                   | 4            | 0.014    | 7                     |
| GOTERM_BP_FAT | liposaccharide metabolic process               | 18           | 0.015    | 121                   |
| GOTERM_BP_FAT | lipid transport                                | 37           | 0.015    | 312                   |
| GOTERM_BP_FAT | acyl-CoA metabolic process                     | 15           | 0.019    | 96                    |

## UP in conventional

| Category     | Term                                  | nr. of genes | PValue   | Tot genes in category |
|--------------|---------------------------------------|--------------|----------|-----------------------|
| KEGG_PATHWAY | Regulation of lipolysis in adipocytes | 16           | 3.27E-04 | 56                    |
| KEGG_PATHWAY | Sphingolipid signaling pathway        | 21           | 0.017    | 120                   |

## UP in hESC

| Category     | Term                                  | nr. of genes | PValue | Tot genes in category |
|--------------|---------------------------------------|--------------|--------|-----------------------|
| KEGG_PATHWAY | Regulation of lipolysis in adipocytes | 10           | 0.046  | 56                    |



## UP in 4.5 EPI

| Category      | Term                                                   | nr. of genes | PValue   | Tot genes<br>in category |
|---------------|--------------------------------------------------------|--------------|----------|--------------------------|
| KEGG_PATHWAY  | Biosynthesis of antibiotics                            | 21           | 6.18E-04 | 214                      |
| KEGG_PATHWAY  | Fatty acid metabolism                                  | 9            | 0.0011   | 51                       |
| KEGG_PATHWAY  | Fatty acid degradation                                 | 7            | 0.016    | 49                       |
| KEGG_PATHWAY  | PPAR signaling pathway                                 | 9            | 0.018    | 80                       |
| KEGG_PATHWAY  | Sphingolipid metabolism                                | 6            | 0.049    | 48                       |
| GOTERM_BP_FAT | cellular lipid catabolic process                       | 24           | 3.08E-07 | 183                      |
| GOTERM_BP_FAT | lipid modification                                     | 23           | 3.18E-06 | 194                      |
| GOTERM_BP_FAT | lipid metabolic process                                | 77           | 4.77E-06 | 1217                     |
| GOTERM_BP_FAT | lipid oxidation                                        | 16           | 5.04E-06 | 102                      |
| GOTERM_BP_FAT | glycerolipid metabolic process                         | 25           | 1.90E-04 | 288                      |
| GOTERM_BP_FAT | fatty acid metabolic process                           | 29           | 3.05E-04 | 371                      |
| GOTERM_BP_FAT | cholesterol efflux                                     | 8            | 9.31E-04 | 43                       |
| GOTERM_BP_FAT | very-low-density lipoprotein particle clearance        | 4            | 1.58E-03 | 7                        |
| GOTERM_BP_FAT | lipid biosynthetic process                             | 34           | 3.97E-03 | 545                      |
| GOTERM_BP_FAT | regulation of plasma lipoprotein particle levels       | 8            | 4.89E-03 | 57                       |
| GOTERM_BP_FAT | regulation of phospholipid biosynthetic process        | 4            | 6.67E-03 | 11                       |
| GOTERM_BP_FAT | regulation of lipid metabolic process                  | 22           | 7.26E-03 | 316                      |
| GOTERM_BP_FAT | acylglycerol metabolic process                         | 11           | 7.64E-03 | 110                      |
| GOTERM_BP_FAT | neutral lipid metabolic process                        | 11           | 8.64E-03 | 112                      |
| GOTERM_BP_FAT | plasma lipoprotein particle organization               | 6            | 8.86E-03 | 35                       |
| GOTERM_BP_FAT | lipoprotein metabolic process                          | 12           | 8.94E-03 | 130                      |
| GOTERM_BP_FAT | protein-lipid complex subunit organization             | 6            | 1.25E-02 | 38                       |
| GOTERM_BP_FAT | negative regulation of fatty acid biosynthetic process | 4            | 1.35E-02 | 14                       |
| GOTERM_BP_FAT | response to lipid                                      | 51           | 1.62E-02 | 991                      |
| GOTERM_BP_FAT | lipid homeostasis                                      | 11           | 1.87E-02 | 126                      |

## UP in 5.5 EPI

| Category      | Term                                              | nr. of genes | PValue   | Tot genes<br>in category |
|---------------|---------------------------------------------------|--------------|----------|--------------------------|
| KEGG_PATHWAY  | Biosynthesis of antibiotics                       | 17           | 0.014    | 214                      |
| GOTERM_BP_FAT | positive regulation of lipid biosynthetic process | 11           | 3.54E-03 | 79                       |

Table S7, Related to Figure 7

Lipid-related gene functions upregulated in either naïve or primed datasets.
